# Supplementary material for: Metaproteomics of saliva identifies human protein markers specific for individuals with periodontitis and dental caries compared to orally healthy controls
Source: PubMed Central journal article supplement (PMC5028799; doi:10.7717/peerj.2433), 2016-09-14

**A**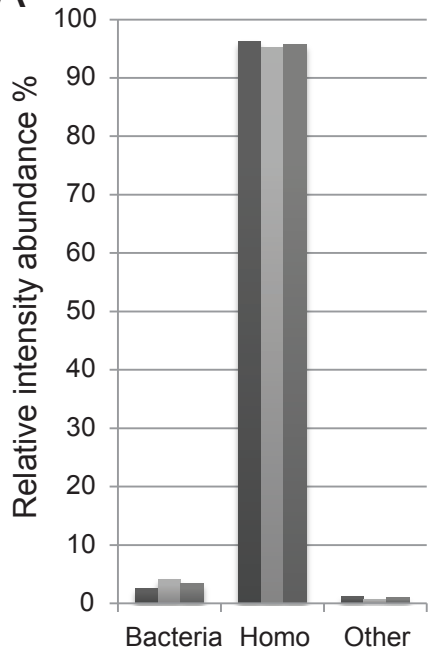**B**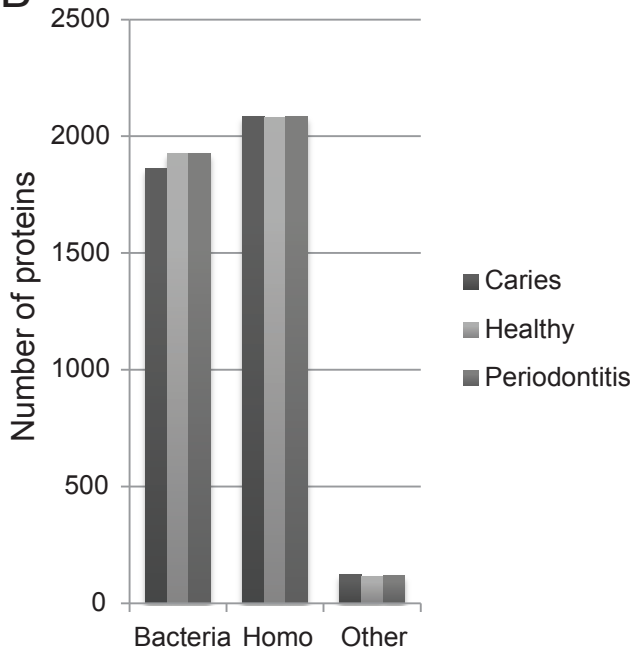

Supplement: peerj-04-2433-s002.pdf [file peerj-04-2433-s002.pdf]
